# Supplementary material for: Evaluating the Impact of Covariate Lookback Times on Performance of Patient-Level Prediction Models
Source: Research Square preprint supplement (doi:10.21203/rs.3.rs-227607/v1), 2021-02-23
Supplement: Supplementary file 2 [file ae021739f08c04ee465750d7.docx]

**Evaluating the Impact of Covariate Lookback Times on Performance of Patient-Level Prediction Models**

**Jill Hardin, PhD1,2, Jenna M. Reps, PhD1,2**

**1Observational Health Data Sciences and Informatics Community, New York, NY, USA; 2Janssen Research and Development, Raritan, NJ, USA**

**Email: jhardi10@its.jnj.com**

**Correspondence:**

Jill Hardin

Department of Epidemiology

Janssen Research & Development, LLC

1125 Trenton-Harbourton Road

Titusville, NJ 08560

USA
