# Supplementary material for: Evaluating the Impact of Covariate Lookback Times on Performance of Patient-Level Prediction Models
Source: Research Square preprint supplement (doi:10.21203/rs.3.rs-227607/v1), 2021-02-23
Supplement: Supplementary file 3 [file c2e1c2d2e0528e45d3965775.xlsx]

## Sheet: FinalTable_Diabetes
Diabetes
Optum, SES
Lookback	Internal Validation, 10 replicates								External Validation
Time (days)	Mean Predictors	Mean	Max	Min	Median	Std	LCI	UCI	CCAE	MDCD	MDCR	Panther
14	693.8	0.657465	0.664023	0.65076	0.657404	0.00388058	0.649859	0.665071	0.661404	0.657499	0.608292	0.636918
30	663.7	0.659268	0.662689	0.65399	0.659677	0.0030857	0.65322	0.665316	0.664145	0.660695	0.617948	0.637006
90	753.4	0.665925	0.669086	0.661952	0.665474	0.00259108	0.660847	0.671004	0.669577	0.668785	0.622294	0.641017
180	801.4	0.67423	0.678908	0.669815	0.673454	0.00339065	0.667584	0.680876	0.676768	0.662811	0.626874	0.636461
365	852.2	0.68362	0.688799	0.67852	0.683491	0.00325652	0.677237	0.690003	0.685653	0.669096	0.641531	0.633292
730	875.9	0.688075	0.69226	0.684094	0.688474	0.00215385	0.683854	0.692297	0.688299	0.664482	0.646179	0.634065
99999	921.7	0.688663	0.695548	0.683418	0.688516	0.00353013	0.681744	0.695582	0.689288	0.6668	0.652948	0.633065
CCAE
Lookback	Internal Validation, 10 replicates								External Validation
Time (days)	Mean Predictors	Mean	Max	Min	Median	Std	LCI	UCI	MDCD	MDCR	Panther	SES
14	597.4	0.665436	0.671921	0.653719	0.666651	0.00573241	0.6542	0.676671	0.656814	0.563459	0.634972	0.637944
30	616.7	0.668452	0.673941	0.662503	0.66844	0.00380929	0.660986	0.675918	0.65986	0.574398	0.635482	0.641486
90	702.2	0.67371	0.679774	0.666388	0.673927	0.00416719	0.665542	0.681877	0.662793	0.588675	0.637545	0.651258
180	746.7	0.682628	0.690349	0.676447	0.682326	0.00418558	0.674424	0.690832	0.669393	0.605764	0.643723	0.662169
365	811.8	0.691818	0.698928	0.685833	0.692612	0.00414522	0.683694	0.699943	0.6717	0.612547	0.643049	0.673173
730	873.4	0.698624	0.703761	0.692226	0.698788	0.00368489	0.691402	0.705847	0.670966	0.611342	0.639912	0.679068
99999	1000.3	0.699779	0.705778	0.695014	0.698432	0.00419531	0.691556	0.708002	0.67108	0.608819	0.642596	0.680482
MDCD
Lookback	Internal Validation, 10 replicates								External Validation
Time	Mean Predictors	Mean	Max	Min	Median	Std	LCI	UCI	CCAE	MDCR	Panther	SES
14	365.6	0.668844	0.68085	0.657368	0.668637	0.0063967	0.656306	0.681381	0.644494	0.579152	0.628653	0.630685
30	392.3	0.671972	0.679775	0.661573	0.671569	0.00578606	0.660631	0.683312	0.644669	0.587649	0.628951	0.632342
90	404.5	0.677593	0.682134	0.669468	0.678025	0.0041352	0.669488	0.685698	0.647208	0.590246	0.634405	0.635845
180	401.7	0.67783	0.686643	0.670978	0.677823	0.00426296	0.669474	0.686185	0.650318	0.595383	0.63609	0.63857
365	415.3	0.682722	0.686368	0.671976	0.683268	0.00401249	0.674857	0.690586	0.654334	0.60967	0.633948	0.641301
730	433.5	0.682415	0.689142	0.673394	0.684465	0.00544674	0.671739	0.69309	0.655491	0.612092	0.636501	0.646783
99999	451.6	0.68297	0.690681	0.670012	0.683277	0.00560703	0.671981	0.69396	0.655752	0.619577	0.63592	0.649319
MDCR
Lookback	Internal Validation, 10 replicates								External Validation
Time	Mean Predictors	Mean	Max	Min	Median	Std	LCI	UCI	CCAE	MDCD	Panther	SES
14	88.3	0.593021	0.617557	0.566975	0.593053	0.0153782	0.56288	0.623162	0.567724	0.540666	0.559199	0.556618
30	114.1	0.603565	0.636472	0.56672	0.602149	0.0200964	0.564176	0.642954	0.566705	0.545073	0.558552	0.560155
90	81.5	0.606993	0.637511	0.592454	0.60389	0.0128733	0.581761	0.632224	0.582235	0.564255	0.572825	0.578001
180	78.2	0.603809	0.625322	0.5928	0.603919	0.0088401	0.586483	0.621136	0.589383	0.571785	0.577633	0.586891
365	81.7	0.607232	0.619956	0.589354	0.610053	0.0102935	0.587056	0.627407	0.591827	0.562432	0.567095	0.591191
730	78.1	0.625333	0.636838	0.613157	0.623256	0.00997458	0.605782	0.644883	0.599451	0.575271	0.576295	0.598579
99999	85.4	0.631189	0.653661	0.616713	0.630502	0.0105444	0.610522	0.651856	0.601772	0.575603	0.580449	0.607002
PANTHER
Lookback	Internal Validation, 10 replicates								External Validation
Time	Mean Predictors	Mean	Max	Min	Median	Std	LCI	UCI	CCAE	MDCD	MDCR	SES
14	988.6	0.667616	0.673478	0.663671	0.667053	0.00319207	0.66136	0.673872	0.653286	0.659673	0.593671	0.640008
30	969.6	0.669307	0.675854	0.665586	0.6687	0.00346538	0.662515	0.676099	0.657348	0.660369	0.596659	0.644425
90	1043	0.67419	0.679874	0.669259	0.673971	0.00341352	0.6675	0.680881	0.660467	0.664428	0.597065	0.648995
180	1022.3	0.677457	0.683423	0.673966	0.676084	0.00305208	0.671475	0.68344	0.668612	0.667921	0.607728	0.657554
365	1057.6	0.680521	0.684537	0.675482	0.680311	0.00300263	0.674635	0.686406	0.678225	0.670887	0.619441	0.665247
730	1142.2	0.681795	0.687054	0.676069	0.681174	0.00363256	0.674675	0.688915	0.680632	0.669345	0.620567	0.66813
99999	1214	0.685068	0.690332	0.680731	0.68414	0.00329186	0.678616	0.69152	0.679704	0.667332	0.62522	0.667288

## Sheet: Stroke
Stroke
Optum, SES
Lookback	Internal Validation, 10 replicates								External Validation
Time	Mean Predictors	Mean	Max	Min	Median	Std	LCI	UCI	CCAE	MDCD	MDCR	Panther
14	524.9	0.780918	0.78569	0.776126	0.781637	0.00334982	0.774353	0.787484	0.702529	0.756405	0.659424	0.745444
30	523.7	0.781968	0.78624	0.776981	0.78227	0.00293435	0.776216	0.787719	0.704701	0.758952	0.663275	0.746065
90	604.3	0.784995	0.789599	0.779259	0.785552	0.00312257	0.778875	0.791115	0.706549	0.765357	0.666216	0.747638
180	629.9	0.786322	0.79059	0.781494	0.787271	0.00322164	0.780008	0.792637	0.708054	0.766938	0.66935	0.747641
365	608.4	0.78689	0.791589	0.780443	0.787257	0.0035335	0.779964	0.793816	0.709995	0.772497	0.675397	0.746551
730	657.6	0.786154	0.790382	0.779548	0.786239	0.00356119	0.779175	0.793134	0.706819	0.771506	0.673428	0.744168
99999	758.4	0.783778	0.788279	0.777697	0.784189	0.00322233	0.777463	0.790094	0.705315	0.771178	0.672809	0.742499
CCAE
Lookback	Internal Validation, 10 replicates								External Validation
Time	Mean Predictors	Mean	Max	Min	Median	Std	LCI	UCI	MDCD	MDCR	Panther	SES
14	337.8	0.719147	0.727203	0.712702	0.718373	0.00530434	0.70875	0.729543	0.736902	0.641433	0.716122	0.740666
30	343.3	0.720484	0.729104	0.712931	0.719857	0.00601991	0.708685	0.732283	0.740847	0.645759	0.71772	0.742735
90	383.8	0.723771	0.734985	0.714549	0.724566	0.00664328	0.710751	0.736792	0.746786	0.647218	0.719509	0.74699
180	371.7	0.724745	0.737591	0.713925	0.726499	0.00830351	0.70847	0.74102	0.752261	0.651518	0.721494	0.751445
365	386.1	0.726504	0.739156	0.714135	0.726402	0.00871907	0.709414	0.743593	0.756805	0.65626	0.724276	0.758381
730	398.5	0.728031	0.738646	0.718854	0.728406	0.00689045	0.714526	0.741536	0.758354	0.659974	0.726331	0.760956
99999	437.6	0.723218	0.733599	0.713721	0.722423	0.00651458	0.710449	0.735987	0.758372	0.652914	0.718688	0.756123
MDCD
Lookback	Internal Validation, 10 replicates								External Validation
Time	Mean.Predictors	Mean	Max	Min	Median	Std	LCI	UCI	CCAE	MDCR	Panther	SES
14	344.2	0.767214	0.778751	0.751135	0.767479	0.0076489	0.752222	0.782206	0.683136	0.630293	0.735323	0.7673
30	377.3	0.769548	0.783347	0.75178	0.769266	0.00853235	0.752825	0.786272	0.68467	0.633645	0.737095	0.768143
90	415.4	0.776285	0.789019	0.761029	0.776422	0.00798509	0.760634	0.791936	0.684305	0.633476	0.735493	0.768028
180	406.6	0.7785	0.7933	0.763267	0.77687	0.0087846	0.761282	0.795718	0.683743	0.64026	0.735804	0.769411
365	427.5	0.781585	0.798485	0.770304	0.779439	0.00808607	0.765736	0.797433	0.678315	0.646878	0.732014	0.765367
730	411.9	0.781374	0.797546	0.768975	0.780723	0.00799635	0.765702	0.797047	0.670052	0.645512	0.727996	0.761174
99999	430.8	0.778826	0.793782	0.76911	0.776941	0.00741452	0.764293	0.793358	0.658572	0.635508	0.722614	0.751014
MDCR
Lookback	Internal Validation, 10 replicates								External Validation
Time	Mean Predictors	Mean	Max	Min	Median	Std	LCI	UCI	CCAE	MDCD	Panther	SES
14	122.8	0.660782	0.688194	0.620611	0.663813	0.0220015	0.617659	0.703905	0.640397	0.687102	0.710542	0.724044
30	107.6	0.661469	0.686631	0.630179	0.667041	0.0190827	0.624066	0.698871	0.638608	0.687058	0.708977	0.722725
90	116.5	0.665755	0.686188	0.638629	0.664841	0.0172123	0.632018	0.699491	0.635401	0.687763	0.706452	0.720578
180	112.4	0.665619	0.685321	0.634366	0.668266	0.0173871	0.631541	0.699698	0.646016	0.704343	0.709373	0.726074
365	109.6	0.666103	0.682374	0.634304	0.669763	0.0163311	0.634094	0.698111	0.646007	0.712596	0.705011	0.72918
730	119.6	0.672298	0.685091	0.645732	0.675202	0.0135987	0.645645	0.698952	0.646067	0.712521	0.698754	0.728849
99999	131.1	0.661737	0.681282	0.638384	0.6599	0.0122064	0.637812	0.685662	0.628155	0.713747	0.693798	0.715097
PANTHER
Lookback	Internal Validation, 10 replicates								External Validation
Time	Mean Predictors	Mean	Max	Min	Median	Std	LCI	UCI	CCAE	MDCD	MDCR	SES
14	1084.2	0.760048	0.762958	0.756527	0.76017	0.00179367	0.756532	0.763563	0.698872	0.757122	0.643634	0.775706
30	1041.5	0.760592	0.763949	0.757509	0.760549	0.00192433	0.75682	0.764363	0.70227	0.759693	0.648414	0.777819
90	1142.5	0.762236	0.765728	0.759571	0.762009	0.00200311	0.75831	0.766162	0.707528	0.763933	0.652464	0.781138
180	1214.3	0.76395	0.766621	0.761239	0.764015	0.00191198	0.760202	0.767697	0.709638	0.767972	0.659071	0.783053
365	1167.7	0.76537	0.767232	0.762621	0.766	0.00157377	0.762285	0.768454	0.713674	0.771005	0.663746	0.784576
730	1179.8	0.765332	0.767615	0.760839	0.765933	0.00198657	0.761439	0.769226	0.711427	0.766442	0.659974	0.782609
99999	1162.1	0.764852	0.768042	0.762185	0.764912	0.00194411	0.761042	0.768662	0.707443	0.767333	0.652211	0.77943

## Sheet: Renal Impairment
Renal Impairment
Optum, SES
Lookback	Internal Validation, 10 replicates								External Validation
Time	Mean Predictors	Mean	Max	Min	Median	Std	LCI	UCI	CCAE	MDCD	MDCR	Panther
14	715.1	0.763924	0.768108	0.760965	0.764022	0.00216763	0.759675	0.768172	0.702366	0.767918	0.683555	0.738397
30	753.8	0.76542	0.77023	0.761721	0.76524	0.00234899	0.760816	0.770024	0.704575	0.769277	0.684102	0.739651
90	829	0.768084	0.772893	0.76428	0.76844	0.00253958	0.763106	0.773061	0.708697	0.773656	0.685649	0.740634
180	866.8	0.769534	0.774571	0.766073	0.769807	0.00254095	0.764554	0.774514	0.709899	0.777128	0.690454	0.740502
365	878.9	0.77015	0.776036	0.766718	0.769724	0.00259893	0.765056	0.775244	0.711794	0.777941	0.691608	0.738449
730	940.5	0.771212	0.776569	0.768249	0.77109	0.00242827	0.766453	0.775971	0.712826	0.779471	0.693693	0.738146
99999	1034.8	0.769377	0.775184	0.76569	0.769521	0.00256788	0.764344	0.77441	0.711893	0.779152	0.694639	0.737073
CCAE
Lookback	Internal Validation, 10 replicates								External Validation
Time	Mean.Predictors	Mean	Max	Min	Median	Std	LCI	UCI	MDCD	MDCR	Panther	SES
14	564	0.710832	0.721686	0.704731	0.708836	0.00554162	0.69997	0.721693	0.749104	0.668991	0.713928	0.720014
30	555.6	0.712977	0.722956	0.708041	0.710517	0.00552113	0.702155	0.723798	0.752538	0.669168	0.716216	0.722573
90	591.6	0.716366	0.726599	0.7105	0.713676	0.00565362	0.705285	0.727447	0.757163	0.676488	0.719528	0.726661
180	590.1	0.718016	0.728361	0.712677	0.716293	0.00492391	0.708365	0.727667	0.763275	0.680913	0.720238	0.731823
365	579.6	0.720696	0.731042	0.716243	0.7192	0.00455062	0.711777	0.729615	0.765897	0.684936	0.720706	0.73824
730	619.5	0.720513	0.731636	0.714947	0.718253	0.00556421	0.709607	0.731418	0.769165	0.684374	0.721368	0.742741
99999	653.3	0.720918	0.733631	0.710777	0.720493	0.00657601	0.708029	0.733807	0.767632	0.685226	0.723193	0.743347
MDCD
Lookback	Internal Validation, 10 replicates								External Validation
Time	Mean.Predictors	Mean	Max	Min	Median	Std	LCI	UCI	CCAE	MDCR	Panther	SES
14	462.4	0.776197	0.782783	0.76559	0.778596	0.00653923	0.76338	0.789014	0.685475	0.672009	0.731971	0.753317
30	469.4	0.777618	0.783376	0.76707	0.780189	0.00635541	0.765161	0.790074	0.685857	0.674078	0.732658	0.753639
90	515.3	0.781683	0.787388	0.771581	0.784511	0.00601986	0.769884	0.793482	0.689971	0.677243	0.734041	0.756965
180	545.4	0.784241	0.788904	0.773758	0.787461	0.00608942	0.772306	0.796176	0.692668	0.679072	0.733831	0.756666
365	582.8	0.784669	0.790217	0.77359	0.787792	0.00599583	0.772917	0.796421	0.693987	0.673644	0.731468	0.756463
730	621.3	0.784843	0.791231	0.774611	0.786022	0.0058804	0.773317	0.796368	0.693449	0.673605	0.731318	0.755944
99999	656.7	0.782914	0.790924	0.774101	0.783795	0.0056409	0.771858	0.79397	0.687571	0.66862	0.727595	0.749804
MDCR
Lookback	Internal Validation, 10 replicates								External Validation
Time	Mean.Predictors	Mean	Max	Min	Median	Std	LCI	UCI	CCAE	MDCD	Panther	SES
14	206	0.675975	0.686753	0.663557	0.675579	0.00774216	0.6608	0.69115	0.667327	0.724479	0.712189	0.711806
30	214.2	0.675284	0.688882	0.662451	0.674519	0.00759492	0.660398	0.69017	0.670206	0.727795	0.712779	0.714208
90	197	0.68297	0.69332	0.669834	0.685466	0.00763873	0.667998	0.697941	0.675987	0.738386	0.711217	0.715886
180	199.2	0.686906	0.70388	0.672771	0.686723	0.00893528	0.669393	0.704419	0.673893	0.73637	0.704953	0.711936
365	188.3	0.686932	0.700587	0.671836	0.686073	0.0074504	0.672329	0.701534	0.672526	0.73751	0.701007	0.706817
730	193.3	0.685841	0.694862	0.666199	0.687513	0.00844736	0.669285	0.702398	0.673856	0.741481	0.703116	0.710759
99999	199	0.68442	0.697096	0.663434	0.685734	0.009716	0.665376	0.703463	0.666899	0.745142	0.70151	0.709352
PANTHER
Lookback	Internal Validation, 10 replicates								External Validation
Time	Mean Predictors	Mean	Max	Min	Median	Std	LCI	UCI	CCAE	MDCD	MDCR	SES
14	1612.2	0.752067	0.755863	0.747539	0.75257	0.00270424	0.746767	0.757367	0.695048	0.771586	0.668757	0.757117
30	1624	0.753624	0.757601	0.748869	0.754475	0.00280094	0.748135	0.759114	0.699518	0.772959	0.670545	0.759741
90	1672.4	0.75559	0.759675	0.751039	0.756679	0.00281893	0.750065	0.761115	0.705238	0.775371	0.675771	0.762821
180	1714.1	0.756577	0.760806	0.751706	0.757337	0.00274532	0.751197	0.761958	0.706927	0.776236	0.675895	0.762682
365	1780	0.757193	0.76181	0.752163	0.757771	0.00289025	0.751528	0.762858	0.708572	0.77625	0.678822	0.76556
730	1801.3	0.757418	0.761428	0.753353	0.757357	0.00258914	0.752343	0.762493	0.709458	0.774929	0.678592	0.766164
99999	1894.9	0.757545	0.761577	0.753839	0.757766	0.00231127	0.753015	0.762075	0.708118	0.772553	0.680837	0.763958

## Sheet: GI Bleed
GI Bleed
Lookback	Internal Validation, 10 replicates								External Validation
Time	Mean Predictors	Mean	Max	Min	Median	Std	LCI	UCI	CCAE	MDCD	MDCR	Panther
14	397.4	0.683285	0.69368	0.677205	0.682848	0.00517365	0.673145	0.693426	0.621195	0.673941	0.633447	0.653277
30	393.8	0.68595	0.696269	0.680959	0.684842	0.00461657	0.676902	0.694999	0.624908	0.675598	0.63732	0.656177
90	391.4	0.690101	0.701247	0.685967	0.688736	0.0046155	0.681054	0.699147	0.634542	0.687181	0.649131	0.664779
180	414.1	0.692568	0.703127	0.687894	0.691638	0.0044371	0.683871	0.701264	0.641884	0.69172	0.652882	0.667041
365	477.4	0.695421	0.703053	0.690882	0.693915	0.00418689	0.687215	0.703628	0.644761	0.696194	0.657825	0.668189
730	491	0.695217	0.705644	0.690244	0.694653	0.0041626	0.687059	0.703376	0.644309	0.690276	0.657501	0.663771
99999	485.5	0.688689	0.699292	0.681461	0.68781	0.00479387	0.679293	0.698085	0.636321	0.682149	0.647807	0.655898
CCAE
Lookback	Internal Validation, 10 replicates								External Validation
Time	Mean.Predictors	Mean	Max	Min	Median	Std	LCI	UCI	MDCD	MDCR	Panther	SES
14	306.1	0.630567	0.640117	0.623466	0.631582	0.00482543	0.621109	0.640025	0.652969	0.619975	0.635859	0.64313
30	267.2	0.633801	0.642181	0.627589	0.63443	0.00420503	0.625559	0.642043	0.66057	0.625531	0.639083	0.650225
90	323	0.644541	0.652829	0.636813	0.644783	0.00522657	0.634297	0.654785	0.67466	0.636366	0.645096	0.660748
180	366.3	0.651802	0.657718	0.642916	0.652407	0.00499252	0.642016	0.661587	0.679406	0.636656	0.648595	0.663903
365	336.6	0.655386	0.661917	0.649837	0.65472	0.00399038	0.647564	0.663207	0.677373	0.643801	0.651144	0.669561
730	364.5	0.659831	0.669973	0.654858	0.65991	0.00444464	0.65112	0.668543	0.67673	0.644975	0.649232	0.672743
99999	397.3	0.649614	0.657301	0.644351	0.648775	0.00450557	0.640783	0.658444	0.670019	0.634556	0.639811	0.665142
MDCD
Lookback	Internal Validation, 10 replicates								External Validation
Time	Mean.Predictors	Mean	Max	Min	Median	Std	LCI	UCI	CCAE	MDCR	Panther	SES
14	249.6	0.687945	0.699833	0.678279	0.686389	0.00720996	0.673814	0.702077	0.615986	0.617719	0.647846	0.664255
30	263.8	0.690741	0.702535	0.680529	0.690735	0.00708288	0.676859	0.704624	0.620928	0.624093	0.648877	0.66636
90	272.9	0.702964	0.713744	0.690884	0.701755	0.00736542	0.688527	0.7174	0.627965	0.634196	0.655415	0.673882
180	263.8	0.705723	0.715755	0.695375	0.706094	0.00748621	0.69105	0.720396	0.632673	0.638948	0.657946	0.675575
365	299.9	0.705903	0.716858	0.695997	0.70382	0.006714	0.692743	0.719062	0.625029	0.641813	0.654727	0.672521
730	292.3	0.704287	0.716896	0.697086	0.701849	0.00652488	0.691498	0.717075	0.624423	0.643402	0.655231	0.672843
99999	396.6	0.698406	0.711807	0.690604	0.695566	0.0071767	0.68434	0.712472	0.612217	0.63125	0.646249	0.655012
MDCR
Lookback	Internal Validation, 10 replicates								External Validation
Time	Mean Predictors	Mean	Max	Min	Median	Std	LCI	UCI	CCAE	MDCD	Panther	SES
14	70.7	0.629502	0.653716	0.61433	0.628936	0.0145879	0.60091	0.658095	0.594909	0.642568	0.625851	0.651805
30	67.2	0.631929	0.657754	0.608242	0.631414	0.0154224	0.601701	0.662157	0.603609	0.64685	0.629523	0.658491
90	75.2	0.638311	0.660499	0.621698	0.632023	0.0146894	0.60952	0.667102	0.612952	0.660535	0.637124	0.665999
180	66.8	0.640693	0.66873	0.622442	0.633519	0.0156183	0.610082	0.671305	0.618273	0.666129	0.639193	0.670097
365	70.7	0.647277	0.675588	0.628931	0.641914	0.0148438	0.618184	0.676371	0.61783	0.66676	0.639324	0.670138
730	61.9	0.651239	0.677786	0.619749	0.64943	0.0194159	0.613183	0.689294	0.617103	0.662147	0.641745	0.670655
99999	71	0.645188	0.664995	0.623761	0.64251	0.0149194	0.615946	0.67443	0.603441	0.651516	0.635625	0.656878
PANTHER
Lookback	Internal Validation, 10 replicates								External Validation
Time	Mean Predictors	Mean	Max	Min	Median	Std	LCI	UCI	CCAE	MDCD	MDCR	SES
14	758.3	0.671311	0.67721	0.668596	0.670657	0.00276448	0.665893	0.676729	0.611931	0.674772	0.623486	0.672906
30	761.3	0.675914	0.68153	0.673271	0.674579	0.0025442	0.670928	0.680901	0.619664	0.681876	0.635939	0.680484
90	811.5	0.681238	0.686398	0.67736	0.681303	0.00257565	0.67619	0.686287	0.631512	0.69477	0.644649	0.687716
180	793.1	0.680593	0.686728	0.659737	0.682621	0.0076584	0.665582	0.695603	0.638984	0.698724	0.646306	0.691087
365	829	0.683224	0.687548	0.678522	0.682901	0.00264808	0.678034	0.688414	0.642868	0.699474	0.647797	0.693166
730	788.1	0.682497	0.687747	0.678431	0.682635	0.00317706	0.67627	0.688724	0.644354	0.696825	0.650395	0.693066
99999	935.6	0.674662	0.682273	0.664219	0.675019	0.0055697	0.663746	0.685579	0.633757	0.687506	0.642619	0.684859
